# Supplementary material for: Oxidation of HOSO˙ by Cl˙: a new source of SO2 in the atmosphere?
Source: Royal Society of Chemistry journal article supplement (doi:10.1039/d1cp01048d), 2021-01-01
Supplement: d1cp01048d1.pdf [file d1cp01048d1.pdf]

**ESI of**  
**Oxidation of HOSO• by Cl•: A new source of**  
**SO<sub>2</sub> in the atmosphere ?**

Amit Kumar,<sup>†</sup> Subhasish Mallick,<sup>‡</sup> and Pradeep Kumar<sup>\*,‡</sup>

*<sup>†</sup>Department of Chemistry, Malaviya National Institute of Technology Jaipur, Jaipur,  
302017, India*

*<sup>‡</sup>Department of Chemistry, Malaviya National Institute of Technology Jaipur, Jaipur,  
302017, India*

E-mail: pradeep.chy@mnit.ac.in

**Sl. No.****Contents**

1. **Table S1:** Optimized geometries in Cartesian coordinates and all normal mode frequencies calculated at the MP2/aug-cc-pV(+d)TZ level of theory.
2. **Table S2:** Pressure dependence bimolecular rate constants  $k(T)$  in  $\text{cm}^3 \text{ molecule}^{-1} \text{ s}^{-1}$  for  $\text{HOSO}^\bullet + \text{Cl}^\bullet$  reaction at within temperature range of 213-400 K.
3. **Table S3:** Bimolecular rate constant (in  $\text{cm}^3 \text{ molecule}^{-1} \text{ s}^{-1}$ ) for the association reaction along with the overall rate constant within the temperature range of 213-400 K.
4. **Table S4:** Comparison of geometrical parameter of relevant molecules optimized at MP2/aug-cc-pV(+d)TZ and reaction energy obtained at CCSD(T)/aug-cc-pV(+d)TZ//MP2/aug-cc-pV(+d)TZ level of theory with the experimental and higher level of theory.
5. **Table S5:** Comparison of frequencies of relevant molecules optimized at MP2/aug-cc-pV(+d)TZ level of theory with the experimental value.
6. **Table S6:** Spin contamination value ( $\langle S^2 \rangle$ ) for the relevant species obtained at MP2/aug-cc-pV(+d)TZ level of theory.
7. **Table S7:** Comparison of L-J parameters for the species having similar size and composition.
8. **Figure S1:** Gibbs free energy profile for the  $\text{HOSO}^\bullet + \text{Cl}^\bullet$  calculated at CCSD(T)/aug-cc-pV(+d)TZ//MP2/aug-cc-pV(+d)TZ level of theory.

Table S1: Optimized geometries in Cartesian coordinates and normal mode frequencies of all species calculate at MP2/aug-cc-pV(+d)TZ level of theory

| Compound         | Cartesian coordinate(Å) |           |           | Frequencies (cm <sup>-1</sup> ) |           |           |           |
|------------------|-------------------------|-----------|-----------|---------------------------------|-----------|-----------|-----------|
| HOSO•            | S                       | 0.137093  | -0.477175 | 0.00                            | 115.411   | 397.9768  | 787.086   |
|                  | O                       | 1.241197  | 0.527636  | 0.00                            | 1093.9523 | 1188.8807 | 3812.0452 |
|                  | O                       | -1.26227  | 0.44581   | 0.00                            |           |           |           |
|                  | H                       | -2.024901 | -0.152764 | -0.000001                       |           |           |           |
| Cl•              | Cl                      | 0.00      | 0.00      | 0.00                            |           |           |           |
| OH•              | O                       | 0.00      | 0.00      | 0.10772                         | 3795.0583 |           |           |
|                  | H                       | 0.00      | 0.00      | -0.86172                        |           |           |           |
| H <sub>2</sub> O | O                       | 0.00      | 0.00      | 0.11819                         | 1627.7612 | 3824.705  | 3950.609  |
|                  | H                       | 0.00      | 0.75803   | -0.47275                        |           |           |           |
|                  | H                       | 0.00      | -0.75803  | -0.47275                        |           |           |           |
| SO <sub>2</sub>  | S                       | 0.00      | 0.00      | 0.36419                         | 535.298   | 1234.4436 | 1419.2614 |
|                  | O                       | 0.00      | 1.25431   | -0.36419                        |           |           |           |
|                  | O                       | 0.00      | -1.25431  | -0.36419                        |           |           |           |
| HCl              | Cl                      | 0.00      | 0.00      | 0.07067                         | 3049.7398 |           |           |
|                  | H                       | 0.00      | 0.00      | -1.20138                        |           |           |           |
| RC <sub>Cl</sub> | S                       | 0.52746   | -0.13874  | -0.4327                         | 216.9845  | 294.4667  | 345.1948  |
|                  | O                       | 1.06675   | -1.18215  | 0.41137                         | 468.9399  | 489.0097  | 804.0112  |
|                  | O                       | 0.98803   | 1.2889    | 0.14482                         | 1105.3615 | 1288.4892 | 3689.3776 |

|                  |    |          |          |          |            |           |           |
|------------------|----|----------|----------|----------|------------|-----------|-----------|
|                  | H  | 0.94258  | 1.27815  | 1.11855  |            |           |           |
|                  | Cl | -1.51884 | 0.00516  | 0.07971  |            |           |           |
| TS <sub>Cl</sub> | S  | -0.79632 | -0.03138 | 0.39604  | -1447.9079 | 111.389   | 349.2023  |
|                  | O  | -1.70871 | -0.79213 | -0.42534 | 463.0222   | 533.0092  | 813.8461  |
|                  | O  | -0.40677 | 1.29873  | -0.23579 | 1071.944   | 1264.7298 | 1609.3846 |
|                  | H  | 0.7434   | 1.00344  | -0.25746 |            |           |           |
|                  | Cl | 1.70127  | -0.26789 | -0.04648 |            |           |           |
| PC <sub>Cl</sub> | S  | 1.52327  | -0.34299 | 0.00161  | 13.5481    | 20.3147   | 95.1187   |
|                  | O  | 2.87248  | 0.18317  | -0.00415 | 294.7054   | 305.0543  | 505.0332  |
|                  | O  | 0.40359  | 0.58472  | 0.00284  | 1119.8885  | 1333.5912 | 2979.6744 |
|                  | H  | -1.6532  | 0.30713  | 0.00209  |            |           |           |
|                  | Cl | -2.8781  | -0.05662 | -0.00103 |            |           |           |
| RC <sub>OH</sub> | S  | 0.00     | 0.11073  | -0.43303 | 119.5506   | 343.2882  | 414.0352  |
|                  | O  | -0.0001  | 1.36746  | 0.30678  | 450.7755   | 494.8956  | 780.8247  |
|                  | O  | 1.24823  | -0.74689 | 0.15139  | 790.6133   | 1075.9903 | 1108.9823 |
|                  | H  | 1.46907  | -0.3799  | 1.02608  | 1265.6144  | 3698.8941 | 3700.4182 |
|                  | O  | -1.24813 | -0.74704 | 0.15138  |            |           |           |
|                  | H  | -1.46913 | -0.37994 | 1.02599  |            |           |           |
| TS <sub>OH</sub> | S  | 0.34819  | 0.04037  | 0.41294  | -1587.0632 | 236.5828  | 429.8697  |
|                  | O  | 1.37815  | -0.54914 | -0.40577 | 497.7447   | 504.6002  | 664.2118  |
|                  | O  | -0.32801 | 1.26015  | -0.24321 | 827.0747   | 1029.1588 | 1238.177  |
|                  | H  | -1.24415 | 0.50103  | -0.43755 | 1307.7955  | 1940.5641 | 3748.5252 |

|           |   |          |          |          |           |           |           |
|-----------|---|----------|----------|----------|-----------|-----------|-----------|
|           | O | -1.34936 | -0.73947 | -0.19255 |           |           |           |
|           | H | -1.93309 | -0.91929 | 0.56276  |           |           |           |
| $PC_{OH}$ | S | 0.64655  | -0.00011 | 0.36915  | 28.6027   | 92.3635   | 105.4821  |
|           | O | 0.74479  | -1.24977 | -0.36122 | 130.2642  | 216.4822  | 243.8289  |
|           | O | 0.7463   | 1.24938  | -0.36131 | 506.5475  | 1130.2826 | 1339.3725 |
|           | H | -2.42298 | 0.76168  | -0.44179 | 1627.9239 | 3803.1789 | 3926.9203 |
|           | O | -2.17856 | 0.00047  | 0.09476  |           |           |           |
|           | H | -2.42211 | -0.76054 | -0.44246 |           |           |           |

Table S2: Pressure dependence bimolecular rate constants  $k(T)$  in  $\text{cm}^3 \text{ molecule}^{-1} \text{ s}^{-1}$  for  $\text{HOSO}\cdot + \text{Cl}\cdot$  reaction at within temperature range of 213-400 K

| Temp (K) | Pressure (atm)         |                        |                        |                        |                        |
|----------|------------------------|------------------------|------------------------|------------------------|------------------------|
|          | 0.1                    | 0.5                    | 1                      | 5                      | 10                     |
| 213      | $5.61 \times 10^{-13}$ |
| 216      | $5.54 \times 10^{-13}$ |
| 219      | $5.48 \times 10^{-13}$ |
| 224      | $5.38 \times 10^{-13}$ |
| 235      | $5.18 \times 10^{-13}$ |
| 250      | $4.93 \times 10^{-13}$ |
| 259      | $4.79 \times 10^{-13}$ |
| 265      | $4.78 \times 10^{-13}$ |
| 270      | $4.64 \times 10^{-13}$ |
| 278      | $4.53 \times 10^{-13}$ |
| 280      | $4.51 \times 10^{-13}$ |
| 290      | $4.38 \times 10^{-13}$ |
| 298      | $4.29 \times 10^{-13}$ |
| 300      | $4.27 \times 10^{-13}$ |
| 310      | $4.16 \times 10^{-13}$ |
| 320      | $4.06 \times 10^{-13}$ |
| 350      | $3.80 \times 10^{-13}$ |
| 400      | $3.44 \times 10^{-13}$ |

Table S3: Bimolecular rate constant (in  $\text{cm}^3 \text{ molecule}^{-1} \text{ s}^{-1}$ ) for the association reaction along with the overall rate constant within the temperature range of 213-400 K

| Temp (K) | HOSO•+Cl•                          |                                | HOSO•+OH•                          |                                |
|----------|------------------------------------|--------------------------------|------------------------------------|--------------------------------|
|          | $k(\text{T})_{\text{association}}$ | $k(\text{T})_{\text{overall}}$ | $k(\text{T})_{\text{association}}$ | $k(\text{T})_{\text{overall}}$ |
| 213      | $5.61 \times 10^{-13}$             | $5.61 \times 10^{-13}$         | $3.57 \times 10^{-10}$             | $3.57 \times 10^{-10}$         |
| 216      | $5.54 \times 10^{-13}$             | $5.54 \times 10^{-13}$         | $4.06 \times 10^{-10}$             | $4.06 \times 10^{-10}$         |
| 219      | $5.48 \times 10^{-13}$             | $5.48 \times 10^{-13}$         | $4.60 \times 10^{-10}$             | $4.60 \times 10^{-10}$         |
| 224      | $5.38 \times 10^{-13}$             | $5.38 \times 10^{-13}$         | $5.61 \times 10^{-10}$             | $5.61 \times 10^{-10}$         |
| 235      | $5.18 \times 10^{-13}$             | $5.18 \times 10^{-13}$         | $8.38 \times 10^{-10}$             | $8.38 \times 10^{-10}$         |
| 250      | $4.93 \times 10^{-13}$             | $4.93 \times 10^{-13}$         | $1.36 \times 10^{-9}$              | $1.36 \times 10^{-9}$          |
| 259      | $4.79 \times 10^{-13}$             | $4.79 \times 10^{-13}$         | $1.75 \times 10^{-9}$              | $1.75 \times 10^{-9}$          |
| 260      | $4.78 \times 10^{-13}$             | $4.78 \times 10^{-13}$         | $1.80 \times 10^{-9}$              | $1.80 \times 10^{-9}$          |
| 265      | $4.71 \times 10^{-13}$             | $4.71 \times 10^{-13}$         | $2.06 \times 10^{-9}$              | $2.06 \times 10^{-9}$          |
| 270      | $4.64 \times 10^{-13}$             | $4.64 \times 10^{-13}$         | $2.33 \times 10^{-9}$              | $2.33 \times 10^{-9}$          |
| 278      | $4.53 \times 10^{-13}$             | $4.53 \times 10^{-13}$         | $2.82 \times 10^{-9}$              | $2.82 \times 10^{-9}$          |
| 280      | $4.51 \times 10^{-13}$             | $4.51 \times 10^{-13}$         | $2.95 \times 10^{-9}$              | $2.95 \times 10^{-9}$          |
| 290      | $4.38 \times 10^{-13}$             | $4.38 \times 10^{-13}$         | $3.66 \times 10^{-9}$              | $3.66 \times 10^{-9}$          |
| 298      | $4.29 \times 10^{-13}$             | $4.29 \times 10^{-13}$         | $4.29 \times 10^{-9}$              | $4.29 \times 10^{-9}$          |
| 300      | $4.27 \times 10^{-13}$             | $4.27 \times 10^{-13}$         | $4.46 \times 10^{-9}$              | $4.46 \times 10^{-9}$          |
| 310      | $4.16 \times 10^{-13}$             | $4.16 \times 10^{-13}$         | $5.34 \times 10^{-9}$              | $5.34 \times 10^{-9}$          |
| 320      | $4.06 \times 10^{-13}$             | $4.06 \times 10^{-13}$         | $6.29 \times 10^{-9}$              | $6.29 \times 10^{-9}$          |
| 350      | $3.80 \times 10^{-13}$             | $3.80 \times 10^{-13}$         | $9.56 \times 10^{-9}$              | $9.56 \times 10^{-9}$          |
| 400      | $3.44 \times 10^{-13}$             | $3.44 \times 10^{-13}$         | $1.58 \times 10^{-8}$              | $1.58 \times 10^{-8}$          |

Table S4: Comparison of geometrical parameter of relevant molecules optimized at MP2/aug-cc-pV(+d)TZ level of theory and reaction energy obtained at CCSD(T)/aug-cc-pV(+d)TZ//MP2/aug-cc-pV(+d)TZ level of theory with the experimental and higher level of theory.

| Molecule                | Method                                     | Bond length (Å)                        | Bond angle (deg)                         |
|-------------------------|--------------------------------------------|----------------------------------------|------------------------------------------|
| HOSO•                   | MP2/aug-cc-pV(+d)TZ                        | S-O=1.45<br>O-H=0.97                   | H-O-S=107.9<br>O-S-O=105.9               |
|                         | CCSD(T)/cc-pV(Q+d)Z <sup>1</sup>           | S-O=1.46<br>O-H=0.96                   | H-O-S=107.9<br>O-S-O=105.4               |
| HCl                     | MP2/aug-cc-pVT(+d)Z                        | H-Cl=1.28                              | -                                        |
|                         | Experimental <sup>2</sup>                  | H-Cl=1.27                              | -                                        |
| SO <sub>2</sub>         | MP2/aug-cc-pV(+d)TZ                        | S-O=1.45                               | O-S-O=119.7                              |
|                         | Experimental <sup>2</sup>                  | S-O=1.43                               | O-S-O=119.5                              |
| Reaction energy (298 K) | Experimental=~-65.6 kcal mol <sup>-1</sup> | with SO=~-64.94 kcal mol <sup>-1</sup> | without SO=~-66.1 kcal mol <sup>-1</sup> |

Table S5: Comparison of frequencies of relevant molecules optimized at MP2/aug-cc-pV(+d)TZ level of theory with the experimental value.

| compound        | frequencies (cm <sup>-1</sup> ) |                           |
|-----------------|---------------------------------|---------------------------|
|                 | MP2/aug-cc-pV(+d)TZ             | Experimental <sup>2</sup> |
| SO <sub>2</sub> | 499                             | 518                       |
|                 | 1119                            | 1151                      |
|                 | 1339                            | 1362                      |
| HCl             | 2886                            | 3049                      |



Table S6: Spin contamination value ( $\langle S^2 \rangle$ ) for the relevant species obtained at MP2/aug-cc-pV(+d)TZ level of theory.

| Species         | HF Type | $\langle S^2 \rangle$ | Ideal value |
|-----------------|---------|-----------------------|-------------|
| HOSO•           | UHF     | 0.7836                | 0.7500      |
| Cl•             | UHF     | 0.7600                | 0.7500      |
| RC              | UHF     | 0.0000                | 0.0000      |
| PC              | UHF     | 0.0000                | 0.0000      |
| TS              | UHF     | 0.0000                | 0.0000      |
| SO <sub>2</sub> | UHF     | 0.0000                | 0.0000      |
| HCl             | UHF     | 0.0000                | 0.0000      |

Table S7: Comparison of L-J parameters for the species having similar size and composition.

| Species                        | $\sigma$ (Å) | $\varepsilon/k_B$ (K) |
|--------------------------------|--------------|-----------------------|
| CO                             | 3.70         | 105                   |
| NO                             | 3.49         | 117                   |
| C <sub>2</sub> H <sub>2</sub>  | 4.13         | 224                   |
| C <sub>2</sub> H <sub>4</sub>  | 4.23         | 217                   |
| C <sub>3</sub> H <sub>6</sub>  | 4.78         | 271                   |
| C <sub>3</sub> H <sub>8</sub>  | 4.94         | 275                   |
| Si <sub>2</sub> H <sub>3</sub> | 4.49         | 318                   |
| Si <sub>2</sub> H <sub>2</sub> | 4.36         | 323                   |

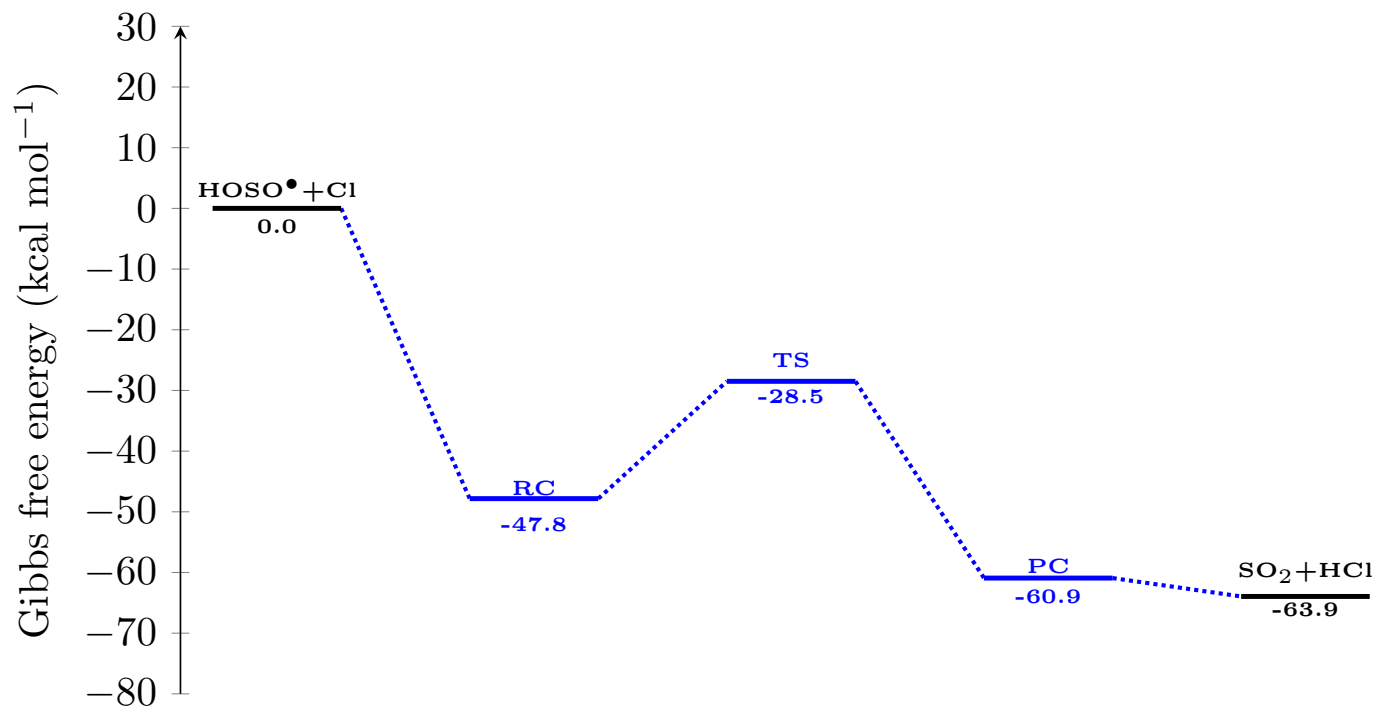

Figure S1: Gibbs free energy profile for the HOSO• + Cl• calculated at CCSD(T)/aug-cc-pV(+d)TZ//MP2/aug-cc-pV(+d)TZ level of theory.

## References

- (1) Wheeler, S. E.; Schaefer III, H. F. *J. Phys. Chem. A* **2009**, *113*, 6779–6788.
- (2) Johnson III, R. D. *NIST 101. Computational chemistry comparison and benchmark database*; 1999.
